# Supplementary material for: Systematic review and meta-analysis of randomised trials and cohort studies of mycophenolate mofetil in lupus nephritis
Source: PubMed Central journal article supplement (PMC1794528; doi:10.1186/ar2093), 2006-12-12
Supplement: ar2093-S2.pdf [file ar2093-S2.pdf]

Additional file 2: Details of cohort studies and randomised trials

| Reference                                                                                                     | Design, numbers, treatments, duration                                                                                                                                                                                                                                                                                                                                           | Patients                                                                                                                                                                                                                                                              | Main efficacy outcomes                                                                                                                                                                                                                                                                           | Main adverse event outcomes                                                                                                                                                                                                                                                                                                                                                                                                                                               |
|---------------------------------------------------------------------------------------------------------------|---------------------------------------------------------------------------------------------------------------------------------------------------------------------------------------------------------------------------------------------------------------------------------------------------------------------------------------------------------------------------------|-----------------------------------------------------------------------------------------------------------------------------------------------------------------------------------------------------------------------------------------------------------------------|--------------------------------------------------------------------------------------------------------------------------------------------------------------------------------------------------------------------------------------------------------------------------------------------------|---------------------------------------------------------------------------------------------------------------------------------------------------------------------------------------------------------------------------------------------------------------------------------------------------------------------------------------------------------------------------------------------------------------------------------------------------------------------------|
| <b>Randomised trials</b>                                                                                      |                                                                                                                                                                                                                                                                                                                                                                                 |                                                                                                                                                                                                                                                                       |                                                                                                                                                                                                                                                                                                  |                                                                                                                                                                                                                                                                                                                                                                                                                                                                           |
| Ye et al. 2001 Abstract 274<br><br>R=1<br>DB=0<br>WD=0                                                        | Randomised open comparison of: MMF (45 patients) 1.5 g daily for 3 months, 1 g daily for 3 months, then 0.5 to 0.75 g daily<br>IV cyclophosphamide (45 patients) 0.75g/sq metre per month for 6-12 months<br>Prednisolone also available                                                                                                                                        | Severe SLE with one or more of lung, renal, CNS involvement, hemolytic anaemia or vasculitic complications<br>No ethnicity given<br>WHO: no criteria given                                                                                                            | MMF significantly improved clinical and laboratory parameters                                                                                                                                                                                                                                    | GI intolerance, infection, leucopaenia, hair loss, liver dysfunction and ovarian failure less with MMF than cyclophosphamide                                                                                                                                                                                                                                                                                                                                              |
| Flores-Suarez et al. ACR 2004 Abstract 1029<br><br>R=1<br>DB=0<br>WD=1                                        | Randomised open comparison over 1 year of:<br>MMF (10 patients) up to 2 g daily<br>IV cyclophosphamide (10 patients) monthly<br>Prednisolone given to all and reduced according to response                                                                                                                                                                                     | Patients with lupus nephritis (type IV and V). Patients broadly similar initially<br>No ethnicity given<br>WHO: 17 IV, 3 V                                                                                                                                            | Based on urine protein excretion and creatinine clearance, results at last follow up were:<br>Complete remission 1/10 IVC, 3/10 MMF<br>Partial remission 1/10 IVC, 3/10 MMF<br>Treatment failure 8/10 IVC, 4/10 MMF                                                                              | Death: 3/10 IVC, 0/10 MMF<br>Leucopenia: 5/10, 1/10<br>Diarrhoea: 0/10, 2/10<br>Infections: 3/10, 5/10, (non severe)<br>Total alopecia: 1/10, 0/10<br>Amenorrhoea: 1/10, 0/10                                                                                                                                                                                                                                                                                             |
| Contreras et al. NEJM 2004 350: 971-980<br>Contreras et al. Lupus 2005 14: s33-s38<br><br>R=2<br>DB=0<br>WD=1 | After IV cyclophosphamide induction, patients randomised to:<br>0.5-1 g/sq metre IV cyclophosphamide every three months (20 patients)<br>1-3 mg/kg azathioprine daily (19)<br>0.5 to 3 g MMF daily with dose titration (20)<br>Oral prednisone or other corticosteroid allowed<br>Duration 1-3 years<br>Median dose of MMF 1.5 g/day during first 12 months, and then decreased | Patients with SLE according to ARA criteria, and with histological diagnosis of lupus nephritis after biopsy (WHO class III or greater)<br>No major differences between groups<br>Average age 32 years<br>55 women, 2 men<br>3W, 27B, 30 H<br>WHO: 12 III, 46 IV, 1 V | Median duration of treatment was 25-30 months<br>Chronic renal failure<br>3/20 IVC, 1/19 AZ, 1/20 MMF<br>Renal relapse (increased protein creatinine ratio) 8/20 IVC, 6/19 AZ, 3/20 MMF<br>Event free survival better for AZ and MMF than IVC, and relapse-free survival better for MMF than IVC | Death: 4/20 IVC, 0/19 AZ, 1/20 MMF (mostly infections)<br>Hospital days per patient year 10 IVC, 1 AZ, 1 MMF<br>Adverse events per patient year back calculated to number beginning therapy:<br>Amenorrhoea: 6/18, 1/18, 1/19<br>Total infection: 15/20, 6/19, 6/20<br>Major infection: 5/20, 0/19, 0/20<br>Minor infection: 10/20, 5/19, 6/20<br>Leucopenia: 2/20, 1/19, 0/20<br>Nausea: 13/20, 1/19, 3/20<br>Vomiting: 11/20, 1/19, 2/20<br>Diarrhoea: 2/20, 2/19, 2/20 |

|                                                                                                                        |                                                                                                                                                                                                                                                                                                                                                                     |                                                                                                                                                                                                                                                       |                                                                                                                                                                                                                                                                                                                                                                                                                                                                                                      |                                                                                                                                                                                                                                                                                                                                                                                                                                                                                                                                                                                                                                    |
|------------------------------------------------------------------------------------------------------------------------|---------------------------------------------------------------------------------------------------------------------------------------------------------------------------------------------------------------------------------------------------------------------------------------------------------------------------------------------------------------------|-------------------------------------------------------------------------------------------------------------------------------------------------------------------------------------------------------------------------------------------------------|------------------------------------------------------------------------------------------------------------------------------------------------------------------------------------------------------------------------------------------------------------------------------------------------------------------------------------------------------------------------------------------------------------------------------------------------------------------------------------------------------|------------------------------------------------------------------------------------------------------------------------------------------------------------------------------------------------------------------------------------------------------------------------------------------------------------------------------------------------------------------------------------------------------------------------------------------------------------------------------------------------------------------------------------------------------------------------------------------------------------------------------------|
| Chan et al. NEJM<br>2000 343: 1156-1162.<br><br>R=1<br>DB=0<br>WD=1                                                    | After biopsy, patients randomised to:<br>oral cyclophosphamide 2.5 mg/kg/day plus prednisolone (21), replaced by azathioprine at 6 months, or oral MMF 2 g daily plus oral prednisolone (21), with dose halved at 6 months, and replaced by azathioprine at 12 months                                                                                               | Patients with SLE according to ARA criteria, and with histological diagnosis of lupus nephritis after biopsy (WHO class IV)<br>No major differences between groups<br>Average age 37 years<br>39 women, 3 men<br>Presumed all Chinese<br>WHO: all IV  | Based on urine protein excretion and creatinine clearance, results at 12 months were:<br>Complete remission 16/21 IVC/AZ, 17/21 MMF<br>Partial remission 3/21 IVC/AZ, 3/21 MMF<br>Treatment failure 2/21 IVC/AZ, 1/21 MMF<br>Relapse 2/21 IVC/AZ, 3/21 MMF<br>There were major reductions in urinary protein excretion in both treatments, to average values of 0.5 and 0.2 g daily, and significant reductions in serum creatinine and increase in serum albumin                                    | Death 2/21 IVC/AZ, 0/21 MMF<br>Infection 7/21 IVC/AZ, 4/21 MMF<br>Leucopenia 2/21 IVC/AZ, 0/21 MMF<br>Hair loss 4/21 IVC/AZ, 0/21 MMF<br>Amenorrhoea 3/21 IVC/AZ, 0/21 MMF<br>Diarrhoea 0/21 IVC/AZ, 1/21 MMF<br>Adverse event discontinuations 1/21 IVC/AZ, 1/21 MMF<br>Hospital admissions for AE (episodes) 6/21 IVC/AZ, 3/21 MMF                                                                                                                                                                                                                                                                                               |
| Chan et al. J Am Soc Nephrol 2005 16: [42 patients from Chan 2000 plus additional patients]<br><br>R=2<br>DB=0<br>WD=1 | After biopsy, additional patients randomised to:<br>oral cyclophosphamide 2.5 mg/kg/day plus prednisolone (30), replaced by azathioprine at 6 months, or oral MMF 2 g daily plus oral prednisolone (32), 1.5g daily at 6 months, and 1 g daily at 12 months<br>Maximum duration was 84 months                                                                       | Patients with SLE according to ARA criteria, and with histological diagnosis of lupus nephritis after biopsy (WHO class IV)<br>No major differences between groups<br>Average age 39 years<br>52 women, 10 men<br>Presumed all Chinese<br>WHO: all IV | Response to induction was:<br>Complete remission 23/30 IVC/AZ, 24/32 MMF<br>Partial remission 7/30 IVC/AZ, 7/32 MMF<br>Longer term relapse: 9/30 IVC/AZ, 11/32 MMF, mostly with clear renal involvement.<br>Relapse-free survival the same in both maintenance groups:<br>any disease relapse 9/30 IVC/AZ, 11/32 MMF<br><br>End-stage renal disease 2/30 IVC/AZ, 0/32 MMF<br>Doubled creatinine 2/30 IVC/AZ, 2/32 MMF                                                                                | Death: 2/30 IVC, 0/32 MMF<br>Severe infections:<br>1 in 103 patient months IVC/AZ, 1 in 234 patient-months MMF<br>Hospital admission for infection 1 in 177 patient months IVC/AZ, 1 in 328 patient-months MMF<br>Infections 12/30 IVC/AZ, 4/32 MMF<br>Infections needing hospital admission 9/30 IVC/AZ, 2/32 MMF<br>Composite end point of renal failure or death (2 deaths) 4/30 IVC/AZ, 0/32 MMF<br>Adverse event discontinuations 3/30 IVC/AZ, 1/32 MMF<br>Leucopenia 8/30 IVC/AZ, 0/32 MMF<br>GI upset 1/30 IVC/AZ, 3/32 MMF<br>Severe hair loss 9/30 IVC/AZ, 0/32 MMF<br>Amenorrhoea 9/25 IVC/AZ (permanent in 5), 1/28 MMF |
| Ong et al. Nephrology 2005 10: 504-510.<br><br>R=2<br>DB=0<br>WD=1                                                     | Patients randomised to:<br>IV cyclophosphamide 0.75-1.0 g/sq metre for six months plus corticosteroids (25)<br>Oral MMF 2 g orally daily for six months plus corticosteroids (19)<br>Dose adjustments were allowed for adverse events, with dose reduction for prednisolone from 40-60 mg daily to maintenance of 5-10 mg daily<br>Mean daily dose of MMF was 1.6 g | Patients had newly diagnosed WHO III or IV lupus nephritis, and were aged 16 or older<br>Average age 31 years, and 37 of 44 patients were women<br>all oriental<br>WHO: 4 III, 40 IV                                                                  | Remission in 13/25 IVC, 11/19 MMF<br>Complete remission 3/25 IVC, 5/19 MMF<br>Proteinuria decreased with both treatments, with upward trend in serum albumin.<br>Creatinine clearance rose over time, though was not different between treatments<br><br>Long-term follow up several years after the six-month induction period showed no major differences between patients whose induction had been with IVC or MMF. Patient survival was 94% and kidney survival 92% for both groups at 36 months | There were no deaths<br>Adverse event withdrawal 1/25 IVC, 0/19 MMF<br>End-stage renal failure 0/25 IVC, 1/19 MMF<br>Oligomenorrhoea 1/25 IVC, 0/19 MMF<br>Serious infection 3/25 IVC, 3/19 MMF<br>Any adverse events 72 IVC, 68 MMF                                                                                                                                                                                                                                                                                                                                                                                               |

|                                            |                                                                                                                                                                                                                                                                                                                                                                                                                                                                                                                       |                                                                                                                                                                                                                       |                                                                                                                                                                                                                                                                                                                                                                                                                                                                                                             |                                                                                                                                                                                                                                                                                                                                                                                                                                                                                                                                                                                                                            |
|--------------------------------------------|-----------------------------------------------------------------------------------------------------------------------------------------------------------------------------------------------------------------------------------------------------------------------------------------------------------------------------------------------------------------------------------------------------------------------------------------------------------------------------------------------------------------------|-----------------------------------------------------------------------------------------------------------------------------------------------------------------------------------------------------------------------|-------------------------------------------------------------------------------------------------------------------------------------------------------------------------------------------------------------------------------------------------------------------------------------------------------------------------------------------------------------------------------------------------------------------------------------------------------------------------------------------------------------|----------------------------------------------------------------------------------------------------------------------------------------------------------------------------------------------------------------------------------------------------------------------------------------------------------------------------------------------------------------------------------------------------------------------------------------------------------------------------------------------------------------------------------------------------------------------------------------------------------------------------|
| Ginzler et al. NEJM<br>2005 353: 2219-2228 | Patients randomised to:<br>IV cyclophosphamide 0.5 g/sq metre increasing to 1.0 g/sq metre, at monthly intervals (69)<br>Oral MMF 1 g daily to maximum of 3 g daily (71)<br>Duration was 3 months, and those with satisfactory response continued for a further 6 months, while those without a satisfactory response crossed to the other regimen, and after this period a further possible crossover was possible<br>All patients received prednisone or other corticosteroid<br>Mean daily dose of MMF 2.7 g daily | Patients had ACR criteria for SLE, and biopsy-proven class IV-VI lupus nephritis with evidence of active nephritis<br>Average age 32 years<br>126 women, 14 men<br>24W, 79B, 28H, 9 other<br>WHO: 22 III, 76 IV, 27 V | Response to induction was:<br>Complete remission 4/69 IVC, 16/71 MMF<br>Partial remission 17/69 IVC, 21/71 MMF<br>No remission at 24 weeks on initial regimen 21/69 IVC, 19/71 MMF<br>Serum creatinine and urine protein excretion fell with both treatments, and serum albumin increased. Oral corticosteroids could be tapered over 3-6 months<br><br>After about 36 months follow up, renal failure or death were twice as frequent after IVC (7 and 8 cases respectively) than after MMF (4 cases each) | Death: 2/69 IVC, 0/71 MMF<br>Withdrawal treatment failure 3/69 IVC, 5/71 MMF<br>Total withdrawal 24/69 IVC, 15/71 MMF<br>Adverse event withdrawal 3/69 IVC, 1/71 MMF<br><br>At least one adverse event 24/75 IVC, 20/83 MMF (including crossover)<br>Severe infection 6/75 IVC, 1/83 MMF<br>Any infection 68/75 IVC, 42/83 MMF<br>Upper GI symptoms 25/75 IVC, 23/83 MMF<br>Diarrhoea 2/75 IVC, 15/83 MMF<br>Amenorrhoea 2/75 IVC, 0/83 MMF<br>Alopecia 8/75 IVC, 0/83 IVC<br>Sustained lymphopenia 14/75 IVC, 5/83 MMF<br>Nausea and vomiting hospital admission 7/75 IVC, 0/83 MMF<br>Rectal bleeding 3/75 IVC, 0/83 MMF |
|--------------------------------------------|-----------------------------------------------------------------------------------------------------------------------------------------------------------------------------------------------------------------------------------------------------------------------------------------------------------------------------------------------------------------------------------------------------------------------------------------------------------------------------------------------------------------------|-----------------------------------------------------------------------------------------------------------------------------------------------------------------------------------------------------------------------|-------------------------------------------------------------------------------------------------------------------------------------------------------------------------------------------------------------------------------------------------------------------------------------------------------------------------------------------------------------------------------------------------------------------------------------------------------------------------------------------------------------|----------------------------------------------------------------------------------------------------------------------------------------------------------------------------------------------------------------------------------------------------------------------------------------------------------------------------------------------------------------------------------------------------------------------------------------------------------------------------------------------------------------------------------------------------------------------------------------------------------------------------|

#### Cohort studies in SLE patients with only lupus nephritis

|                                                     |                                                                                                                                                                                                                                                                                                                                                                |                                                                                                                                                                                                                                                                                        |                                                                                                                                                                                                                                                                                                                             |                                                                                                                                                                                                      |
|-----------------------------------------------------|----------------------------------------------------------------------------------------------------------------------------------------------------------------------------------------------------------------------------------------------------------------------------------------------------------------------------------------------------------------|----------------------------------------------------------------------------------------------------------------------------------------------------------------------------------------------------------------------------------------------------------------------------------------|-----------------------------------------------------------------------------------------------------------------------------------------------------------------------------------------------------------------------------------------------------------------------------------------------------------------------------|------------------------------------------------------------------------------------------------------------------------------------------------------------------------------------------------------|
| Dooley et al. J AM Soc<br>nephrol 1999 10: 833-839. | Prospective cohort of 13 patients followed up for 2-24 months<br>MMF doses began at 0.5 to 2 g daily, to maximum of 1.0 to 2.5 g daily                                                                                                                                                                                                                         | Resistant or relapsing lupus nephritis, after previous therapy<br>Age range 16-48 years<br>9 women, 4 men<br>8W, 4B, 1 H<br>WHO: 12 IV, 1 V                                                                                                                                            | Over 13 months average treatment, there was a significant reduction in proteinuria (PC ratio fell from 5.5 to 2.9), and serum creatinine was stable or improved (mean fall 149 to 123 $\mu$ mol/L)<br>Abnormal urine sediment in 13/13 initially, 7/13 at 13 months<br>Prednisone dose reduced in 10/13, eliminated in 2/13 | 1/13 discontinued because of pancreatitis (MMF-related)<br>1/13 had period of leucopaenia<br>1/13 had scalp hair loss<br>3/13 mild nausea or diarrhoea<br>1/13 severe nausea, vomiting and diarrhoea |
| Kingdon et al. Lupus<br>2001 10: 606-611.           | Prospective cohort of 13 patients followed up for 6-37 months<br>Median maintenance dose was 1 g daily (range 250 mg to 3 g daily)                                                                                                                                                                                                                             | All satisfied ACR criteria for SLE, and nine had deteriorating renal function. All had previously relapsed on conventional treatment, or to minimise steroid dose and avoid further cytotoxic use<br>Age range 20 to 47 years<br>All women<br>4W, 3B, 6 other<br>WHO: 1 III, 6 IV, 6 V | Over 25 months average treatment, nephrotic relapse occurred in 1/13, though MMF was re-introduced<br>Disease severity scores fell in 12/13<br>Mean proteinuria fell from 1.5 g daily to 0.9 g daily<br>Oral corticosteroids reduced 6/10 or stopped 2/10                                                                   | 1/13 withdrew non-compliance<br>1/13 withdrew because of severe nausea<br>3/13 moderate/severe infections<br>2/13 GI symptoms<br>0/13 severe leucopaenia or anaemia                                  |
| Hu et al. Chin Med J<br>2002 115: 705-709.          | Prospective open non-randomised trial in 46 patients followed for 45 months<br>MMF initial dose 1-1.5 g daily, reduced to 0.5 to 1 g daily<br>Cyclophosphamide intravenously followed by pulsed therapy to dose of 2-3 grams, followed by prednisone 0.8 mg/kg/day. IV cyclophosphamide at 0.75 to 1.0 g/sq metre given monthly for six months, then quarterly | All had SLE according to ARA criteria, urine sediments and proteinuria, renal biopsy showing lupus nephritis, and without severe concomitant disease<br>Average age 29 years<br>38 women, 8 men<br>Presumed all Chinese<br>WHO: all IV                                                 | Over 45 months follow up, 21/23 on MMF had more than 50% reduction in urinary RBC, and 16/21 in urinary protein excretion. For 8/23, urine protein excretion was below 0.5 g daily<br>Repeat renal biopsy showed improvements                                                                                               | Adverse events were:<br>2/23 herpes zoster<br>6/23 GI symptoms<br>4/23 infections<br>0/23 leucopaenia                                                                                                |

|                                               |                                                                                                                                                                                |                                                                                                                                                                                                                                                                   |                                                                                                                                                                                                                                                                                                                                                                                                                                                                     |                                                                                                                                                         |
|-----------------------------------------------|--------------------------------------------------------------------------------------------------------------------------------------------------------------------------------|-------------------------------------------------------------------------------------------------------------------------------------------------------------------------------------------------------------------------------------------------------------------|---------------------------------------------------------------------------------------------------------------------------------------------------------------------------------------------------------------------------------------------------------------------------------------------------------------------------------------------------------------------------------------------------------------------------------------------------------------------|---------------------------------------------------------------------------------------------------------------------------------------------------------|
| Spetie et al. Kidney Int 2004 66: 2411-2415.  | Prospective cohort of 13 patients with nephritis followed up for 4-30 months<br>MMF doses were 1 g daily initially, then 1.5 to 2 g daily by 2-4 weeks                         | SLE patients satisfied at least four ACR criteria, with no immunosuppressive therapy before onset of nephritis<br>Age range 20-60 years<br>11 women, 2 men<br>7W, 5B, 1 other<br>WHO: all V                                                                       | Mean treatment duration was 16 months. By six months of therapy, 10/13 achieved complete (8) or partial (2) remission, with 11/13 at longest follow up.<br>Oral prednisone reduced in 12/13 patients<br>Reduction in proteinuria                                                                                                                                                                                                                                    | Serious adverse event 1/13 infection<br>1/13 mild diarrhoea<br>0/12 leucopaenia or anaemia                                                              |
| Kim et al. EULAR 2004, Abstract 0360          | Cohort of 46 patients with lupus nephritis treated with MMF for at least 3 months<br>Dose not given                                                                            | No additional patient details given<br>All Korean<br>WHO: implied IV/V                                                                                                                                                                                            | Complete remission 26/46<br>Partial remission 7/46<br>Relapse after complete remission 2/46<br>No response 13/46<br>Improved ESR and serum albumin, decreased proteinuria and steroid dose reported                                                                                                                                                                                                                                                                 | Gastrointestinal problems affected 28/46, with hair loss, leucopaenia, anaemia, infection, myalgia and headache mentioned, but no severe adverse events |
| Ding et al. Lupus 2004 13: 113-118.           | Prospective cohort of 9 patients with lupus nephritis followed up for at least 6 months<br>MMF dose 1-2 g daily for three months, with subsequent reductions                   | Renal biopsy confirmed lupus nephritis<br>Age range 14-39 years<br>6 women, 3 men<br>Presumed all Chinese<br>WHO: all IV                                                                                                                                          | After 6 months, all 9 patients were free of systemic symptoms, with significant fall in protein excretion and haematuria. Disease activity indices improved<br>4/9 complete remission (protein excretion <1 g daily)<br>4/9 partial remission (protein excretion 1-2 g daily)<br>1/9 failed treatment                                                                                                                                                               | Gastrointestinal adverse events were described as tolerable                                                                                             |
| Kapitsinou et al. Rheumatol 2004 43: 377-380. | Retrospective cohort of 18 patients with lupus nephritis followed up for up to 31 months<br>MMF dose 2 g daily                                                                 | All patients had SLE according to ACR criteria, with biopsy-proven lupus nephritis.<br>12 patients had proliferative lupus nephritis and 6 lupus membranous nephropathy<br>Average age 32 years<br>17 women, 1 man<br>No ethnicity given<br>WHO: 9 III, 6 IV, 3 V | After an average of 15 months of treatment:<br>10/18 complete remission (protein excretion <0.5 g daily)<br>4/18 partial remission (protein excretion <2 g daily, or 30% or more reduction)<br>4/18 failures (all membranous nephropathy)<br>Significant reduction in urine protein excretion, sediment, and serum creatinine, with increased creatinine clearance<br>Steroid dose reduced in 14/18 patients, from 15mg daily initially to 7 mg at end of follow up | 1/18 developed a serious infection, and died 1 year later<br>2/18 gastrointestinal intolerance needing dose changes                                     |
| Borba et al. ACR 2005 Abstract 1129           | Prospective cohort of 20 patients with SLE and proteinuria followed up for an average of 12 months<br>Initial MMF dose of 1.5 g daily increased to 2-3 g daily after one month | Main inclusion criterion refractive proteinuria despite corticosteroids. 12 patients had biopsy documented membranous glomerulonephritis<br>Average age 35 years<br>No ethnicity given<br>WHO: all V                                                              | Partial response ( $\geq 50\%$ decrease in proteinuria) in 20/20, with mean protein excretion down from 3.5 g to 1.3 g daily, and significant increase in serum albumin, after 8 months<br>Complete response (normal urine protein excretion of <0.3 g daily) in 11/20 after 12 months, with mean urine protein of 0.2 g daily.<br>No response in 3/20 patients<br>Oral prednisone fell from an average of 34 mg to 2 mg daily                                      | No information given                                                                                                                                    |

|                                                          |                                                                                                                                                                                       |                                                                                                                                                                                                                           |                                                                                                                                                                                                                                                                                                                                                                                   |                                                                                                                                                                                                                          |
|----------------------------------------------------------|---------------------------------------------------------------------------------------------------------------------------------------------------------------------------------------|---------------------------------------------------------------------------------------------------------------------------------------------------------------------------------------------------------------------------|-----------------------------------------------------------------------------------------------------------------------------------------------------------------------------------------------------------------------------------------------------------------------------------------------------------------------------------------------------------------------------------|--------------------------------------------------------------------------------------------------------------------------------------------------------------------------------------------------------------------------|
| Karim et al.<br>Rheumatology 2005<br>44: 1317-1321.      | Retrospective cohort of 10 patients, with follow up 3-52 months<br>MMF starting dose 0.5 g daily to maximum of 1.0 to 2.5 g daily                                                     | Biopsy-proven lupus membranous nephropathy<br>9/10 fulfilled ACR criteria for SLE<br>Previous therapy azathioprine, cyclosporine, and cyclophosphamide<br>Age range 30-49 years<br>8 women, 2 men<br>5W, 5B<br>WHO: all V | Mean treatment duration 19 months<br>Disease severity scores fell in 3/6 patients<br>ESR fell in 7/8 patients<br>Serum creatinine fell in 6/10<br>Urine protein excretion fell in 9/10 patients, especially at higher initial excretion rate (median 2.3 initially to 0.7 at last follow up<br>Serum albumin levels increased significantly<br>Daily prednisolone reduced in 8/10 | 2/10 infections (not obviously severe)<br>5/10 GI symptoms<br>1/10 discontinuation due to GI symptoms                                                                                                                    |
| Cross et al. Nephron<br>Clin Pract 2005<br>100:c92-c100. | Prospective cohort of induction regimen in 24 patients with lupus nephritis for 1 year (19 completed 1 year)<br>MMF initially 1 g daily, to 2 g daily over 4 weeks, with prednisolone | All patients had renal biopsy proven lupus nephritis. No patient previously treated with MMF or cyclophosphamide<br>Average age 33 years<br>21 women, 3 men<br>18W, 3B, 3 other<br>WHO: 4 III, 11 IV, 9 V                 | At 6 months, 20/24 had complete renal remission , 2/24 partial remission, 2/24 refractory<br>At 12 months 5/20 now had only partial remission<br>Urine protein excretion fell from 3.9 to 1.3 g daily, while serum albumin rose from 28 to 37 g/L. Anti-dsDNA titres also fell.                                                                                                   | 5/24 withdrawn (2 refractory, 1 serious infection, 1 flare in extra-renal disease, 1 continuing disease).<br>Other adverse events were:<br>9/24 infections<br>4/24 GI<br>3/24 venous thrombosis<br>1/24 thrombocytopenia |

**Cohort studies that included SLE patients without lupus nephritis**

|                                                 |                                                                                                                                        |                                                                                                                                                                                                                                                                                  |                                                                                                                                                                                                                                                                           |                                                                                                                                                                                                                                                                            |
|-------------------------------------------------|----------------------------------------------------------------------------------------------------------------------------------------|----------------------------------------------------------------------------------------------------------------------------------------------------------------------------------------------------------------------------------------------------------------------------------|---------------------------------------------------------------------------------------------------------------------------------------------------------------------------------------------------------------------------------------------------------------------------|----------------------------------------------------------------------------------------------------------------------------------------------------------------------------------------------------------------------------------------------------------------------------|
| Gaubitz et al. Lupus 1999 8: 731-736.           | Prospective cohort of 10 patients with follow up 8-16 months<br>MMF 1.5 or 2 g daily, depending on weight                              | ACR defined SLE, >12 SLAM, 16-65 years<br>Corticosteroids, antimalarials, and other therapies used at start. 4/10 with nephritis<br>Age range 16-46 years<br>All women<br>No ethnicity given<br>WHO: 1 II, 3 IV                                                                  | Over 11 months average treatment, SLAM 16 initially reduced to 10 and 8 at 3 and 6 months; 8/10 >20% reduction in SLAM at 6 months<br>SLE-related erythema improved in 5/5, and arthritis in 5/6<br>ESR reduced, and mean prednisolone dose reduced from 10 to 5 mg daily | No significant change in blood markers<br>No adverse event discontinuations<br>4/10 diarrhoea initially<br>2/10 prurigo<br>2/10 vertigo<br>0/10 severe infections                                                                                                          |
| Karim et al. Rheumatol 2002 41: 876-882.        | Prospective cohort of 21 patients followed up for 0.5 to 33 months<br>MMF starting dose was 0.5 g daily to a maximum of 2 g daily      | At least four of ACR criteria for SLE, mostly previously treated with immunosuppressants. 13 patients had active renal disease at entry<br>Age range 21 to 47 years<br>20 women, 1 man<br>12W, 8B, 1 other<br>WHO: 1 II, 4 III, 6 IV, 2 V                                        | Over 14 months average treatment, disease activity scores fell from 13 initially to 4 at the last visit<br>Proteinuria fell from 3.7 to 1.1 g daily<br>Prednisolone reduced from mean 20 mg daily to 10 mg daily (15/16)                                                  | 3/21 withdrew because adverse events, mainly gastrointestinal<br>2/21 wished to become pregnant<br>2/21 moderate or severe infections<br>1/21 leucopaenia                                                                                                                  |
| Doria et al. ACR abstract 1464, 2003            | Prospective cohort of 42 patients, followed up for 2-24 months (28 followed up for 9 months)<br>MMF dose was 2 g daily with prednisone | SLE patients with:<br>glomerulonephritis (15)<br>thrombocytopenia (2)<br>arthritis (6)<br>CNS involvement (2)<br>glomerulonephritis after standard induction therapy (14)<br>Age range 21-49 years<br>37 women, 5 men<br>No ethnicity given<br>WHO: all IV                       | Over 11 months average treatment, there was a significant improvement in disease activity scores and reduction in prednisone dose. Proteinuria was reduced in patients with glomerulonephritis after induction therapy                                                    | Adverse events were:<br>6/42 adverse event withdrawals<br>3/42 treatment failure withdrawals<br>5/42 infections<br>4/42 nausea<br>3/42 abdominal pain<br>2/42 diarrhoea<br>3/42 dizziness, headache<br>1/42 leucopaenia                                                    |
| Riskella et al. J Rheumatol 2003 30: 1508-1512. | Retrospective consecutive patients (54), followed up for an average of 12 months<br>MMF dose ranged from 125 mg to 3 g daily           | SLE patients with confirmed diagnosis receiving MMF, about two-thirds receiving azathioprine or cyclophosphamide at some time. 26/54 with active renal disease at start of MMF therapy<br>Average age 37 years<br>50 women, 4 men<br>39W, 14B, 1 other<br>WHO: no criteria given | Over 12 months average treatment there were significant improvements on disease activity scores, and significant reduction in daily prednisone (from 20 mg to 12 mg daily) with stable creatinine                                                                         | Any adverse event 36/54, probably related to MMF<br>2/54 serious adverse events<br>1/54 serious infection<br>21/54 gastrointestinal<br>24/54 infections<br>3/54 leucopaenia<br>Withdrawals:<br>9/54 adverse event<br>3/54 lack of efficacy<br>2/54 pregnancy<br>2/54 other |

|                                               |                                                                                                                                                               |                                                                                                                                                                                                                                                                         |                                                                                                                                                                                                                                                                                                                                                      |                                                                                                                                                                                                                                                                                                                                             |
|-----------------------------------------------|---------------------------------------------------------------------------------------------------------------------------------------------------------------|-------------------------------------------------------------------------------------------------------------------------------------------------------------------------------------------------------------------------------------------------------------------------|------------------------------------------------------------------------------------------------------------------------------------------------------------------------------------------------------------------------------------------------------------------------------------------------------------------------------------------------------|---------------------------------------------------------------------------------------------------------------------------------------------------------------------------------------------------------------------------------------------------------------------------------------------------------------------------------------------|
| Shekshina et al. EULAR 2003 abstract no.      | Prospective cohort of 36 patients, with 29 completing at least 6 months treatment<br>MMF 2 g daily                                                            | SLE patients inadequately controlled with corticosteroids, cytotoxics, cyclosporine or antimalarials; 19 patients had lupus nephritis<br>Age range 17-51 years<br>32 women, 4 men<br>No ethnicity given<br>WHO: no criteria given                                       | Overall improvements for clinical disease scoring, white cell counts, and serum protein and albumin in those with lupus nephritis. Proteinuria improved in 6/15 with nephritis.<br>Also improved were erythema (3/9), skin vasculitis (2/4), arthritis/arthralgia (4/11), headache (5/12)<br>Oral prednisolone decreased from mean 18 to 15 mg daily | Adverse events were:<br>2/29 treatment failure<br>4/29 adverse events (dizziness, nausea, allergy, thrombocytopenia)<br>4/29 hair loss<br>2/29 nausea<br>2/29 abdominal pain<br>2/29 infections                                                                                                                                             |
| Bijl et al. Ann Rheum Dis 2003 62: 534-539.   | Prospective cohort of 10 patients with SLE with rising anti-dsDNA antibodies treated for 6 months with MMF<br>MMF dose 2 g daily                              | SLE patients satisfied at least four ACR criteria<br>Age range 22-63 years<br>9 women, 1 man<br>No ethnicity given<br>WHO: no criteria given                                                                                                                            | No patient had a clinical relapse on MMF. Significant fall in anti-dsDNA antibodies over treatment period. Patient assessment of improvement significant from 2-6 months                                                                                                                                                                             | Minor hypertensive event in one patient requiring increased therapy, and one unconfirmed fever<br>0/10 leucopaemia or anaemia                                                                                                                                                                                                               |
| Frassi et al. EULAR 2005 Abstract 0455        | Prospective cohort of 25 patients with renal and nonrenal lupus resistant to conventional immunosuppressive therapy for 3-42 months<br>MMF dose 0.5-2 g daily | All previously treated with various immunosuppressive drugs<br>Age range 21-54 years<br>24 women, 1 man<br>No ethnicity given<br>WHO: no criteria given                                                                                                                 | After a median treatment duration of 18 months patients had reduced disease activity. Proteinuria and creatinine clearance not significantly different. No effect in 7/25 patients<br>Significant reduction in oral prednisone from 12 to 11 mg daily                                                                                                | Adverse events in 14/25 patients<br>5/25 discontinued because of adverse events<br>7/25 GI disorders<br>5/25 infections<br>1/25 CNS lymphoma<br>1/25 hypoglycaemia                                                                                                                                                                          |
| Pisoni et al. J Rheumatol 2005 32: 1047-1052. | Retrospective cohort of 86 patients with SLE, 59 with lupus nephritis followed up for an average of 16 months<br>Maximum MMF dose was 0.5 to 2.5 g daily      | All patients had SLE according to ACR criteria. 59 had lupus nephritis and 29 uncontrolled disease activity. All patients had at least one immunosuppressive drug before MMF<br>Average age 37 years<br>76 women, 10 men<br>44W,24B,18 other<br>WHO: 11 III, 12 IV, 9 V | In all patients, there were reductions in steroid dose and activity index, and improvement in ESR. In 35 renal patients there was reduced proteinuria from 3.0 to 1.9 g daily.                                                                                                                                                                       | Discontinuations because of adverse events occurred in 14/86 patients, mostly because of GI complaints or infections<br>12/86 discontinued because of lack of efficacy, 6/86 pregnancy<br>Other adverse events were:<br>37/86 at least one adverse event<br>25/86 GI symptoms<br>20/86 infections<br>2/86 depression<br>1/86 haematological |
